# Supplementary material for: Spatial Variation of the Effect of Multidimensional Urbanization on PM2.5 Concentration in the Beijing–Tianjin–Hebei (BTH) Urban Agglomeration
Source: MDPI journal article supplement (doi:10.3390/ijerph182212077), 2021-11-17
Supplement: s1 [file s1]

## Supplementary:

Table S1. Values of all variables for each county in the BTH urban agglomeration

| Prefecture | County      | PM <sub>2.5</sub><br>( $\mu\text{g}/\text{m}^3$ ) | GDP<br>(billion yuan) | POP<br>(thousand inhabitants) | LPI<br>(unitless) | PLADJ<br>(unitless) |
|------------|-------------|---------------------------------------------------|-----------------------|-------------------------------|-------------------|---------------------|
| Beijing    | Changping   | 46.14                                             | 54.9502               | 1407.95                       | 29.07             | 97.01               |
|            | Chaoyang    | 74.61                                             | 321.929               | 2752.21                       | 91.74             | 99.10               |
|            | Daxing      | 77.48                                             | 112.313               | 1161.94                       | 55.51             | 97.06               |
|            | Dongcheng   | 81.92                                             | 121.501               | 623.76                        | 100.00            | 99.04               |
|            | Fangshan    | 51.97                                             | 39.3584               | 751.28                        | 40.31             | 95.78               |
|            | Fengtai     | 78.57                                             | 81.2857               | 1575.82                       | 94.12             | 98.79               |
|            | Haidian     | 62.51                                             | 358.602               | 2738.64                       | 79.79             | 98.31               |
|            | Huairou     | 34.48                                             | 19.9513               | 313.37                        | 48.17             | 94.62               |
|            | Mentougou   | 35.03                                             | 16.7576               | 320.01                        | 44.32             | 94.43               |
|            | Miyun       | 41.63                                             | 18.6502               | 367.70                        | 32.17             | 93.84               |
|            | Pinggu      | 53.59                                             | 17.0023               | 329.45                        | 26.31             | 94.43               |
|            | Shijingshan | 70.96                                             | 35.6595               | 485.59                        | 100.00            | 98.79               |
|            | Shunyi      | 54.93                                             | 101.133               | 748.18                        | 25.15             | 96.60               |
|            | Tongzhou    | 71.85                                             | 44.2232               | 934.53                        | 24.37             | 96.69               |
|            | Xicheng     | 81.56                                             | 211.455               | 879.85                        | 100.00            | 99.29               |
|            | Yanqing     | 30.51                                             | 8.58625               | 248.08                        | 15.75             | 93.51               |
| Baoding    | Anguo       | 75.90                                             | 8.29972               | 314.02                        | 13.22             | 95.27               |
|            | Anxin       | 78.63                                             | 4.16456               | 306.53                        | 12.35             | 94.93               |
|            | Boye        | 76.42                                             | 3.12034               | 181.39                        | 15.65             | 94.96               |
|            | Anxing      | 74.19                                             | 7.57805               | 413.59                        | 12.43             | 95.15               |
|            | Dingzhou    | 73.11                                             | 21.9045               | 890.20                        | 13.15             | 94.85               |
|            | Fuping      | 32.57                                             | 2.57703               | 172.80                        | 5.50              | 88.40               |
|            | Gaobeidian  | 80.64                                             | 8.43167               | 396.86                        | 18.12             | 94.82               |
|            | Gaoyang     | 79.74                                             | 6.83276               | 279.19                        | 22.94             | 95.30               |
|            | Jingxiu     | 89.17                                             | 12.7953               | 332.18                        | 75.32             | 97.19               |
|            | Laishui     | 39.98                                             | 5.07756               | 277.25                        | 10.45             | 92.34               |
|            | Laiyuan     | 28.41                                             | 5.06077               | 211.61                        | 16.78             | 91.86               |
|            | Li          | 77.11                                             | 6.02829               | 356.02                        | 11.43             | 95.52               |
|            | Lianchi     | 92.49                                             | 24.6979               | 413.97                        | 82.65             | 97.54               |
|            | Mancheng    | 64.25                                             | 5.99169               | 274.23                        | 25.41             | 94.08               |
|            | Qingyuan    | 78.42                                             | 6.87146               | 507.03                        | 6.66              | 95.53               |
|            | Quyang      | 53.44                                             | 5.06576               | 449.02                        | 11.50             | 93.58               |
|            | Rongcheng   | 80.08                                             | 3.84675               | 193.79                        | 10.14             | 95.15               |
|            | Shunping    | 57.92                                             | 3.95445               | 238.31                        | 12.68             | 93.22               |
|            | Tang        | 48.20                                             | 4.91653               | 434.43                        | 9.95              | 93.10               |
|            | Wangdu      | 75.00                                             | 3.8978                | 195.07                        | 19.88             | 95.22               |
|            | Xiong       | 80.93                                             | 7.00524               | 286.32                        | 16.00             | 94.91               |
|            | Xushui      | 74.41                                             | 7.286                 | 447.08                        | 17.25             | 95.07               |
|            | Yi          | 45.10                                             | 7.61654               | 400.68                        | 10.42             | 92.24               |

|          |                |       |         |        |       |       |
|----------|----------------|-------|---------|--------|-------|-------|
|          | Zhuozhou       | 74.73 | 18.9385 | 496.59 | 24.50 | 94.16 |
| Cangzhou | Cang           | 75.83 | 18.2257 | 548.51 | 4.31  | 93.80 |
|          | Dongguang      | 76.45 | 9.41416 | 260.01 | 20.42 | 93.10 |
|          | Haixing        | 70.05 | 3.71    | 183.82 | 11.07 | 93.00 |
|          | Hejian         | 79.30 | 18.8079 | 619.14 | 10.57 | 93.64 |
|          | Huanghua       | 73.41 | 20.7745 | 357.82 | 12.51 | 94.65 |
|          | Mengcun        | 71.94 | 5.40709 | 139.52 | 23.65 | 94.37 |
|          | Nanpi          | 75.28 | 6.41679 | 269.67 | 2.37  | 92.76 |
|          | Botou          | 76.11 | 13.3286 | 442.30 | 21.37 | 92.70 |
|          | Qing           | 79.54 | 11.9431 | 305.81 | 19.39 | 93.66 |
|          | Renqiu         | 80.63 | 39.2549 | 642.72 | 32.45 | 94.66 |
|          | Suning         | 75.76 | 9.02533 | 241.06 | 21.13 | 94.13 |
|          | Wuqiao         | 75.23 | 4.78772 | 183.10 | 23.09 | 91.26 |
|          | Xian           | 74.27 | 13.1825 | 450.71 | 8.91  | 93.66 |
|          | Xinhua         | 83.63 | 23.0602 | 561.69 | 87.67 | 97.69 |
|          | Yanshan        | 69.79 | 10.6554 | 373.29 | 12.41 | 93.03 |
|          | Yunhe          | 75.43 | 14.7802 | 230.41 | 69.97 | 96.63 |
| Chengde  | Chengde        | 30.29 | 8.332   | 291.46 | 8.55  | 88.79 |
|          | Fengning       | 19.41 | 7.3314  | 306.54 | 5.91  | 89.75 |
|          | Kuancheng      | 38.55 | 15.0677 | 201.45 | 5.70  | 88.61 |
|          | Longhua        | 22.94 | 8.23462 | 331.17 | 11.80 | 89.54 |
|          | Luanping       | 30.05 | 10.4403 | 222.31 | 9.62  | 89.53 |
|          | Pingquan       | 28.55 | 11.8421 | 366.84 | 13.49 | 88.98 |
|          | Shuangluan     | 32.24 | 7.48072 | 122.54 | 36.16 | 93.89 |
|          | Shuangqiao     | 34.27 | 11.3512 | 240.98 | 46.77 | 92.71 |
|          | Weichang       | 18.65 | 8.07357 | 414.77 | 6.40  | 87.37 |
|          | Xinglong       | 39.10 | 7.62174 | 242.43 | 18.51 | 88.70 |
|          | Yingshouyingzi | 35.20 | 2.01126 | 41.68  | 71.45 | 95.55 |
| Handan   | Chengan        | 63.27 | 7.92046 | 284.17 | 14.24 | 94.30 |
|          | Chi            | 50.21 | 11.2622 | 320.86 | 14.19 | 93.76 |
|          | Congtai        | 70.25 | 17.3103 | 455.41 | 37.58 | 96.01 |
|          | Daming         | 69.49 | 9.30367 | 658.01 | 15.84 | 93.50 |
|          | Feixiang       | 66.30 | 6.13487 | 286.50 | 12.14 | 93.83 |
|          | Fengfeng       | 56.57 | 10.8016 | 316.52 | 40.85 | 94.55 |
|          | Fuxing         | 64.22 | 23.4424 | 417.77 | 56.91 | 96.60 |
|          | Guantao        | 69.34 | 6.73894 | 267.28 | 19.50 | 93.22 |
|          | Guangping      | 67.81 | 5.26222 | 222.91 | 22.98 | 94.59 |
|          | Hanshan        | 66.86 | 14.7344 | 376.08 | 22.11 | 95.55 |
|          | Jize           | 63.72 | 5.94093 | 227.69 | 16.91 | 94.10 |
|          | Linzhang       | 61.65 | 8.07397 | 522.28 | 14.68 | 93.76 |
|          | Qiuxian        | 69.16 | 4.78031 | 175.24 | 16.04 | 93.62 |
|          | Quzhou         | 66.10 | 7.69921 | 354.47 | 16.01 | 93.77 |
|          | Shexian        | 32.84 | 15.0164 | 293.34 | 39.97 | 93.04 |
|          | Wei            | 64.51 | 8.83943 | 688.01 | 9.51  | 93.88 |

|              |             |       |         |        |        |       |
|--------------|-------------|-------|---------|--------|--------|-------|
|              | Wuan        | 41.87 | 39.7027 | 564.19 | 33.85  | 94.47 |
|              | Yongnian    | 64.63 | 14.7386 | 602.83 | 14.33  | 94.28 |
| Hengshui     | Anping      | 74.17 | 7.49002 | 233.76 | 26.75  | 94.75 |
|              | Fucheng     | 76.08 | 4.60993 | 247.66 | 12.58  | 92.37 |
|              | Gucheng     | 73.72 | 8.20475 | 392.37 | 14.35  | 93.21 |
|              | Yizhou      | 69.25 | 7.0195  | 273.87 | 18.63  | 93.31 |
|              | Jing        | 74.20 | 10.122  | 412.43 | 9.05   | 92.12 |
|              | Raoyang     | 74.26 | 4.29073 | 215.84 | 12.30  | 94.80 |
|              | Shenzhou    | 72.52 | 10.6792 | 424.10 | 11.91  | 94.43 |
|              | Taocheng    | 71.66 | 8.95457 | 297.00 | 50.94  | 95.91 |
|              | Wuqiang     | 71.50 | 3.3257  | 136.45 | 10.31  | 93.73 |
|              | Wuyi        | 73.50 | 4.72286 | 242.17 | 15.82  | 93.05 |
|              | Zaoqiang    | 72.72 | 5.83466 | 278.72 | 13.60  | 93.46 |
| Langfang     | Anci        | 82.21 | 13.6077 | 289.88 | 24.65  | 94.21 |
|              | Bazhou      | 83.22 | 23.9361 | 450.63 | 30.50  | 95.55 |
|              | Dachang     | 64.59 | 5.85939 | 86.65  | 24.16  | 93.99 |
|              | Dacheng     | 81.90 | 8.53661 | 383.94 | 7.31   | 92.91 |
|              | Guan        | 81.43 | 13.2519 | 372.39 | 17.04  | 93.77 |
|              | Guangyang   | 82.14 | 16.956  | 281.44 | 63.18  | 96.14 |
|              | Sanhe       | 64.01 | 35.5038 | 455.94 | 28.27  | 95.00 |
|              | Wenan       | 83.55 | 10.3784 | 391.80 | 25.02  | 94.69 |
|              | Xianghe     | 69.38 | 12.8679 | 233.27 | 25.20  | 94.20 |
|              | Yongqing    | 81.31 | 7.97599 | 296.31 | 8.42   | 92.91 |
| Qinhuangdao  | Beidaihe    | 50.32 | 4.41753 | 69.72  | 42.89  | 95.13 |
|              | Changli     | 56.02 | 14.3069 | 370.33 | 12.74  | 94.63 |
|              | Funing      | 47.30 | 16.0106 | 175.32 | 12.21  | 92.29 |
|              | Haigang     | 46.64 | 32.5136 | 595.76 | 45.79  | 96.35 |
|              | Lulong      | 51.59 | 8.67354 | 306.61 | 11.41  | 92.02 |
|              | Qinglong    | 40.89 | 8.87083 | 420.30 | 9.17   | 86.95 |
|              | Shanhaiguan | 47.35 | 1.90409 | 59.74  | 72.15  | 95.70 |
| Shijiazhuang | Gaoyi       | 68.59 | 5.98508 | 153.63 | 60.78  | 95.13 |
|              | Gaocheng    | 68.23 | 12.2692 | 582.41 | 21.92  | 95.26 |
|              | Jinzhou     | 70.99 | 18.2223 | 380.19 | 5.20   | 94.36 |
|              | Jingxing M  | 58.64 | 3.99285 | 62.46  | 66.54  | 96.23 |
|              | Jingxing    | 40.85 | 10.6642 | 257.00 | 23.61  | 92.42 |
|              | Lingshou    | 44.69 | 7.26599 | 252.42 | 19.68  | 92.74 |
|              | Luquan      | 60.71 | 6.41248 | 330.63 | 36.21  | 95.63 |
|              | Luancheng   | 68.19 | 3.15674 | 235.91 | 21.38  | 95.42 |
|              | Pingshan    | 34.19 | 13.3525 | 359.59 | 10.13  | 91.82 |
|              | Qiaoxi      | 41.21 | 29.7404 | 476.45 | 100.00 | 99.37 |
|              | Shenze      | 74.26 | 6.86853 | 169.61 | 25.19  | 94.75 |
|              | Wuji        | 68.83 | 12.4921 | 374.94 | 19.55  | 94.57 |
|              | Xinji       | 70.94 | 26.313  | 449.77 | 24.27  | 94.84 |
|              | Xinhua      | 83.63 | 23.0602 | 561.69 | 98.26  | 99.17 |

|             |            |       |         |        |       |       |
|-------------|------------|-------|---------|--------|-------|-------|
|             | Xinle      | 66.38 | 12.786  | 345.24 | 30.40 | 94.64 |
|             | Xingtang   | 51.40 | 9.35336 | 328.20 | 6.79  | 92.62 |
|             | Yuhua      | 82.98 | 14.7009 | 325.30 | 95.98 | 99.04 |
|             | Yuanshi    | 57.18 | 12.1139 | 300.42 | 13.56 | 94.81 |
|             | Zanhuang   | 46.56 | 6.55326 | 191.83 | 13.40 | 92.62 |
|             | Changan    | 85.52 | 28.2102 | 467.52 | 94.63 | 98.55 |
|             | Zhao       | 68.05 | 13.7373 | 415.59 | 18.74 | 94.38 |
|             | Zhengding  | 66.25 | 21.1322 | 391.92 | 29.11 | 95.26 |
| Tangshan    | Caofeidian | 66.59 | 18.3629 | 234.56 | 44.11 | 99.00 |
|             | Fengnan    | 73.61 | 58.9266 | 411.76 | 18.71 | 95.61 |
|             | Fengrun    | 66.24 | 41.8831 | 580.75 | 23.70 | 94.72 |
|             | Guzhi      | 69.26 | 12.8765 | 222.92 | 64.51 | 96.67 |
|             | Pingkai    | 74.68 | 7.60981 | 155.88 | 59.57 | 96.68 |
|             | Laoting    | 59.74 | 22.2386 | 321.48 | 32.45 | 96.98 |
|             | Lubei      | 82.66 | 6.04824 | 138.94 | 94.07 | 98.68 |
|             | Lunan      | 78.85 | 17.9637 | 577.44 | 54.90 | 95.92 |
|             | Luannan    | 67.75 | 18.0146 | 320.67 | 37.04 | 95.71 |
|             | Luanzhou   | 62.18 | 32.6615 | 438.23 | 8.19  | 93.93 |
|             | Qianan     | 51.66 | 62.0508 | 536.92 | 17.48 | 95.81 |
|             | Qianxi     | 48.85 | 28.9623 | 296.08 | 14.67 | 92.30 |
|             | Yutian     | 66.79 | 26.5676 | 506.20 | 15.72 | 93.89 |
|             | Zunhua     | 54.67 | 36.2314 | 560.54 | 19.43 | 93.17 |
| Xingtai     | Baixiang   | 62.38 | 2.29243 | 137.11 | 22.74 | 94.24 |
|             | Guangzong  | 66.05 | 3.11757 | 238.74 | 16.28 | 94.56 |
|             | Julu       | 62.84 | 4.36619 | 303.43 | 15.37 | 94.34 |
|             | Lincheng   | 48.94 | 4.14026 | 154.85 | 7.37  | 91.74 |
|             | linxi      | 73.10 | 5.1717  | 278.12 | 15.12 | 92.85 |
|             | Longyao    | 62.72 | 6.1007  | 372.81 | 10.75 | 94.26 |
|             | Nangong    | 70.20 | 6.83829 | 346.08 | 19.56 | 94.09 |
|             | Nanhe      | 62.65 | 3.83684 | 262.55 | 19.11 | 94.16 |
|             | Neiqiu     | 46.86 | 4.89197 | 209.57 | 12.30 | 92.66 |
|             | Ningjin    | 65.33 | 12.8834 | 526.62 | 11.37 | 94.58 |
|             | Pingxiang  | 64.23 | 3.8024  | 245.16 | 15.58 | 94.27 |
|             | Qinghe     | 75.12 | 9.39708 | 313.93 | 29.92 | 94.34 |
|             | Renze      | 60.23 | 2.8673  | 240.89 | 18.07 | 94.38 |
|             | Shahe      | 49.56 | 15.3636 | 308.33 | 17.59 | 94.21 |
|             | Wei        | 70.61 | 5.23579 | 414.68 | 15.30 | 94.21 |
|             | Xiangdou   | 73.11 | 9.7578  | 309.44 | 56.32 | 96.69 |
|             | Xinhe      | 65.33 | 2.15843 | 127.81 | 33.51 | 94.42 |
|             | Xindu      | 40.84 | 18.1735 | 525.18 | 27.75 | 93.77 |
| Zhangjiakou | Chicheng   | 19.58 | 5.90634 | 226.96 | 15.69 | 91.03 |
|             | Chongli    | 17.58 | 3.67408 | 113.70 | 7.74  | 88.09 |
|             | Guyuan     | 14.83 | 3.34123 | 169.02 | 22.19 | 92.11 |
|             | Huaian     | 21.95 | 4.4048  | 171.94 | 13.71 | 92.46 |

|         |            |       |         |         |        |       |
|---------|------------|-------|---------|---------|--------|-------|
|         | Huailai    | 28.17 | 9.43237 | 266.44  | 20.76  | 92.87 |
|         | Kangbao    | 13.12 | 3.20582 | 200.82  | 9.61   | 91.21 |
|         | Qiaodong   | 24.84 | 5.57605 | 152.12  | 47.53  | 95.51 |
|         | Qiaoxi     | 41.21 | 29.7404 | 476.45  | 52.10  | 95.77 |
|         | Shangyi    | 14.94 | 2.50989 | 139.94  | 11.40  | 89.30 |
|         | Wanquan    | 21.04 | 5.85059 | 176.66  | 20.88  | 94.13 |
|         | Wei        | 26.66 | 5.57129 | 350.30  | 8.84   | 91.38 |
|         | Xiahuayuan | 28.01 | 2.50404 | 72.90   | 32.68  | 92.83 |
|         | Xuanhua    | 24.67 | 13.2049 | 371.48  | 30.81  | 93.54 |
|         | Yangyuan   | 26.21 | 2.97554 | 194.74  | 13.39  | 92.20 |
|         | Zhangbei   | 14.55 | 6.79394 | 272.46  | 13.15  | 90.17 |
|         | Zhuolu     | 25.78 | 6.69324 | 256.45  | 6.95   | 90.08 |
| Tianjin | Baodi      | 73.17 | 46.894  | 692.04  | 12.54  | 93.32 |
|         | Beichen    | 82.00 | 81.554  | 995.32  | 35.37  | 96.30 |
|         | Binhai New | 74.33 | 603.553 | 1965.58 | 23.51  | 98.35 |
|         | Dongli     | 78.78 | 72.0392 | 777.55  | 52.80  | 97.16 |
|         | Dongping   | 82.99 | 10.6686 | 145.42  | 100.00 | 98.74 |
|         | Hebei      | 82.83 | 41.9806 | 655.96  | 100.00 | 98.96 |
|         | Hedong     | 82.25 | 54.2673 | 744.73  | 100.00 | 99.15 |
|         | Hexi       | 82.12 | 35.2006 | 434.26  | 100.00 | 99.30 |
|         | Hongqiao   | 83.77 | 19.4351 | 406.90  | 94.46  | 98.92 |
|         | Jizhou     | 59.34 | 70.6343 | 649.40  | 10.90  | 92.58 |
|         | Jinnan     | 74.97 | 53.2027 | 574.59  | 22.08  | 96.03 |
|         | Jinghai    | 79.18 | 6.78517 | 541.43  | 12.77  | 94.02 |
|         | Nankai     | 83.46 | 33.4422 | 460.56  | 100.00 | 99.19 |
|         | Ninghe     | 77.47 | 52.8932 | 383.63  | 16.33  | 93.32 |
|         | Wuqing     | 79.42 | 84.4421 | 994.02  | 19.33  | 93.91 |
|         | Xiqing     | 80.65 | 63.9924 | 529.19  | 73.37  | 97.58 |
